# Supplementary material for: The TLR4/ERK/PD-L1 axis may contribute to NSCLC initiation
Source: PubMed Central journal article supplement — Int J Oncol. 2020 May 19;57(2):456–65. doi: 10.3892/ijo.2020.5068 (PMC7307593; doi:10.3892/ijo.2020.5068), 2020-05-19
Supplement: Supplementary_Data.pdf [file Supplementary_Data.pdf]

Figure S1. Representative immunohistochemical staining images of lung cancer and match adjacent para-cancerous tissues. Representative images of TLR4 staining in (A) para-cancerous tissue and lung SCC tissues, (B) para-cancerous tissue and lung ADC tissues. Representative images of PD-L1 staining in (C) para-cancerous tissue and lung SCC tissues, (D) para-cancerous tissue and lung ADC tissues. ADC, adenocarcinoma; SCC, squamous cell carcinoma; TLR4, toll-like receptor; PD-L1, programmed-death ligand 1.

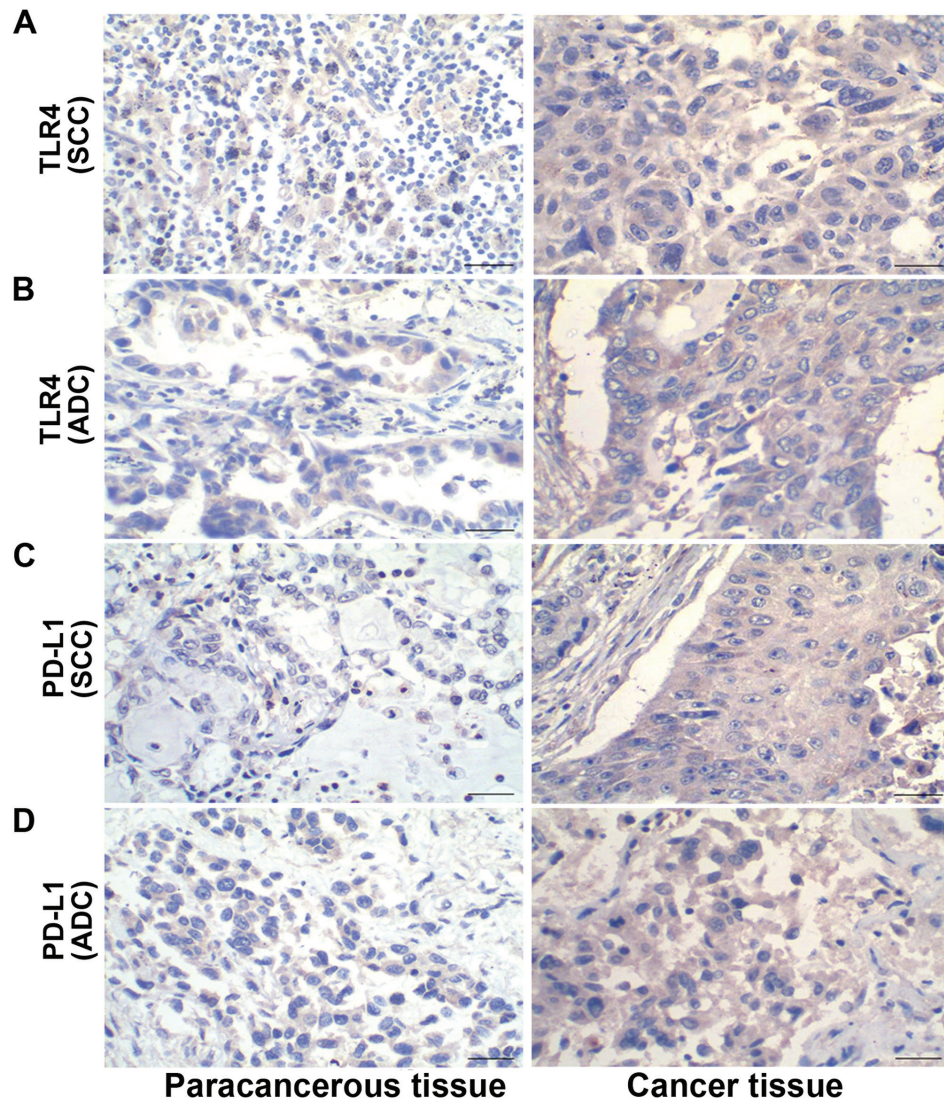

Table SI. The rates of TLR4 and PD-L1 expression in NSCLC tissues and para-cancerous tissues.

| Parameters             | Cases | TLR4 |    | Positive rate | P-value <sup>a</sup> | PD-L1 |    | Positive rate | P-value <sup>b</sup> |
|------------------------|-------|------|----|---------------|----------------------|-------|----|---------------|----------------------|
|                        |       | +    | -  |               |                      | +     | -  |               |                      |
| NSCLC tissues          | 60    | 31   | 29 | 51.70%        | 0.0001               | 37    | 23 | 61.7          | <0.0001              |
| Para-cancerous tissues | 20    | 1    | 19 | 5%            |                      | 2     | 18 | 3.3           |                      |

<sup>a</sup>% TLR4+ in NSCLC tissues vs. % TLR4+ in para-cancerous tissues; <sup>b</sup>% PD-L1+ in NSCLC tissues vs. % TLR4+ in para-cancerous tissues; Pearson's  $\chi^2$ -test was used. PD-L1, programmed cell death ligand 1; TLR4, toll-like receptor 4.

Table SII. Incidences of TLR4 and PD-L1 co-expression in NSCLC tissues.

| PD-L1 | TLR4 |    | Total |
|-------|------|----|-------|
|       | +    | -  |       |
| +     | 24   | 13 | 37    |
| -     | 7    | 16 | 23    |
| Total | 31   | 29 | 60    |

PD-L1, programmed cell death ligand 1; TLR4, toll-like receptor 4.
